# Supplementary material for: Probing bacterial cell wall growth by tracing wall-anchored protein complexes
Source: PubMed Central journal article supplement (PMC8042023; doi:10.1038/s41467-021-22483-8), 2021-04-12
Supplement: 41467_2021_22483_MOESM3_ESM.pdf [file 41467_2021_22483_MOESM3_ESM.pdf]

## **Description of Additional Supplementary Files**

File Name: Supplementary Software 1

Description: All custom-written Python scripts for imaging and data analysis are provided in the supplementary software.
